# Supplementary material for: Mechanistic Understanding of the Palmitoylation of Go Protein in the Allosteric Regulation of Adhesion Receptor GPR97
Source: MDPI journal article supplement (doi:10.3390/pharmaceutics14091856), 2022-09-02
Supplement: s1 [file s1]

## Supplemental Information

### Mechanistic Understanding of the Palmitoylation of the $G_o$ Protein in the Allosteric Regulation of Adhesion Receptor GPR97

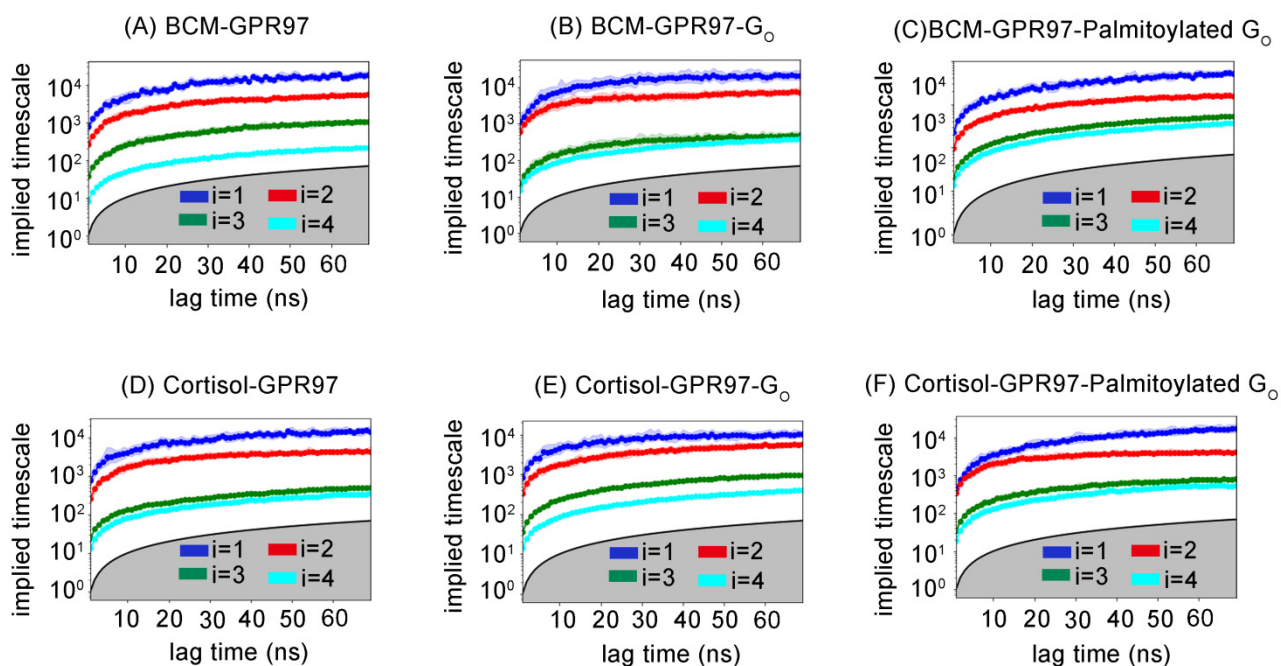

**Figure S1.** The result of implied timescale test for MSMs in BCM-GPR97 (A), BCM-GPR97- $G_o$  (B), BCM-GPR97-Palmitoylated  $G_o$  (C), Cortisol-GPR97 (D), Cortisol-GPR97- $G_o$  (E), and Cortisol-GPR97-Palmitoylated  $G_o$  (F) systems. Blue, red, green, and cyan lines showed the timescale  $\tau_1$ ,  $\tau_2$ ,  $\tau_3$  and  $\tau_4$  as a function of lag times. Black line represents  $x=y$  in logarithmic coordinates.

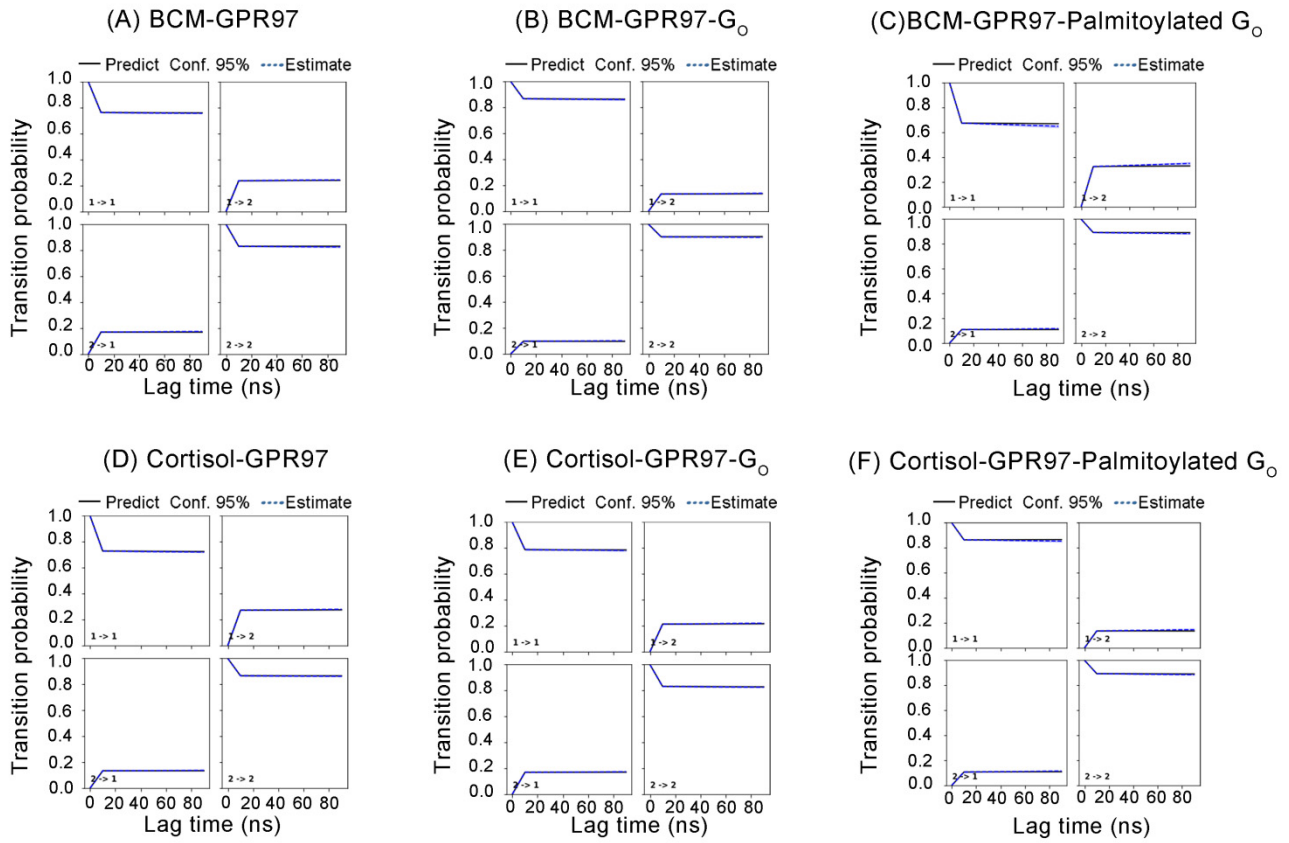

**Figure S2.** The results of the Chapman-Kolmogorov test of metastable states for BCM-GPR97 **(A)**, BCM-GPR97-G<sub>O</sub> **(B)**, BCM-GPR97-Palmitoylated G<sub>O</sub> **(C)**, Cortisol-GPR97 **(D)**, Cortisol-GPR97-G<sub>O</sub> **(E)**, and Cortisol-GPR97-Palmitoylated G<sub>O</sub> **(F)** systems system. Shown are data for MSM (black line) and the observed trajectory (blue dotted line, with estimated error).
